# Supplementary material for: Association between respiratory disease pathogens in calves near feedlot arrival with treatment for bovine respiratory disease and subsequent antimicrobial resistance status
Source: Frontiers journal article supplement (doi:10.3389/fvets.2024.1416436), 2024-07-23
Supplement: Data_Sheet_1.pdf [file Data_Sheet_1.pdf]

## *Supplementary Material*

### **Association between respiratory disease pathogens in calves near feedlot arrival with treatment for bovine respiratory disease and subsequent antimicrobial resistance status**

Jennifer N. Abi Younes<sup>1</sup>, John R. Campbell<sup>1</sup>, Sheryl P. Gow<sup>2</sup>, Amelia R. Woolums<sup>3</sup>, Cheryl L. Waldner<sup>1\*</sup>

<sup>1</sup>Department of Large Animal Clinical Sciences, Western College of Veterinary Medicine, University of Saskatchewan, Saskatoon, SK, Canada

<sup>2</sup>Canadian Integrated Program for Antimicrobial Resistance Surveillance, Public Health Agency of Canada, Saskatoon, SK, Canada

<sup>3</sup>Department of Pathobiology and Population Medicine, College of Veterinary Medicine, Mississippi State University, Mississippi State, MS, United States

**\* Correspondence:**

Cheryl L. Waldner

[cheryl.walder@usask.ca](mailto:cheryl.walder@usask.ca)

#### **1 Supplementary Tables**

**Table S0.** Bovine respiratory disease clinical scoring system used to identify calves eligible for first treatment. Adapted from Step *et al.* (24).

| <b>BRD Clinical Scoring System – Reference List</b> |                 |                                                                                                                                                                                                                                    |                                                                                                     |
|-----------------------------------------------------|-----------------|------------------------------------------------------------------------------------------------------------------------------------------------------------------------------------------------------------------------------------|-----------------------------------------------------------------------------------------------------|
| <b>Score</b>                                        | <b>BRD Code</b> | <b>Key Clinical Signs</b><br>(*one or more signs are observed)                                                                                                                                                                     | <b>Occasional Clinical Signs</b><br>(*may also be observed)                                         |
| <b>0</b>                                            | <b>Normal</b>   | <ul style="list-style-type: none"><li>▪ Clinically normal animal</li></ul>                                                                                                                                                         |                                                                                                     |
| <b>1</b>                                            | <b>Mild BRD</b> | <ul style="list-style-type: none"><li>▪ Mildly ↑ respiratory rate</li><li>▪ Mild – moderate gauntness</li><li>▪ Quiet when observed from afar, but <b>becomes alert when sees a human</b></li><li>▪ Shallow or dry cough</li></ul> | <ul style="list-style-type: none"><li>▪ Nasal discharge (clear, cloudy, white, or yellow)</li></ul> |

| BRD Clinical Scoring System – Reference List |                                 |                                                                                                                                                                                                                                                                                                                                                                                                                                                                                                                                                                                       |                                                                                                                                                                             |
|----------------------------------------------|---------------------------------|---------------------------------------------------------------------------------------------------------------------------------------------------------------------------------------------------------------------------------------------------------------------------------------------------------------------------------------------------------------------------------------------------------------------------------------------------------------------------------------------------------------------------------------------------------------------------------------|-----------------------------------------------------------------------------------------------------------------------------------------------------------------------------|
| Score                                        | BRD Code                        | Key Clinical Signs<br>(*one or more signs are observed)                                                                                                                                                                                                                                                                                                                                                                                                                                                                                                                               | Occasional Clinical Signs<br>(*may also be observed)                                                                                                                        |
| 2                                            | <b>Moderate BRD</b>             | <ul style="list-style-type: none"> <li>▪ Mild or moderate depression               <ul style="list-style-type: none"> <li>• <b>lethargic</b>, but may become alert when approached</li> <li>• lower than normal head carriage</li> <li>• “hiding” behavior</li> </ul> </li> <li>▪ <b>Mild – moderate muscle weakness</b> <ul style="list-style-type: none"> <li>• droopy ears</li> <li>• slow stepping or mild incoordination</li> </ul> </li> <li>▪ <b>Coughing repeatedly</b></li> <li>▪ Breathing with <b>slightly ↑ abdominal effort</b></li> <li>▪ Moderate gauntness</li> </ul> | <ul style="list-style-type: none"> <li>▪ ↑ Respiratory rate</li> <li>▪ Nasal discharge (clear, cloudy, white, or yellow)</li> </ul>                                         |
| 3                                            | <b>Severe BRD</b>               | <ul style="list-style-type: none"> <li>▪ Severe depression or weakness               <ul style="list-style-type: none"> <li>• <b>when approached: does not become alert</b>, low head carriage maintained, does not move away</li> <li>• cross stepping</li> </ul> </li> <li>▪ Repeated <b>deep cough</b></li> <li>▪ <b>Marked respiratory effort</b> <ul style="list-style-type: none"> <li>• open mouth breathing or panting</li> <li>• moderate – marked ↑ abdominal effort</li> </ul> </li> </ul>                                                                                 | <ul style="list-style-type: none"> <li>▪ ↑ Respiratory rate</li> <li>▪ Nasal discharge (clear, cloudy, white, or yellow)</li> <li>▪ Moderate – extreme gauntness</li> </ul> |
| 4                                            | <b>Moribund</b><br>(near death) | <ul style="list-style-type: none"> <li>▪ <b>Down, does not rise</b> when approached or stimulated</li> <li>▪ Standing, but <b>does not move unless directly stimulated</b> <ul style="list-style-type: none"> <li>• very weak: drags feet, sways, stumbles, falls</li> </ul> </li> <li>▪ <b>Eyes very sunken, abdomen very tucked up</b></li> </ul>                                                                                                                                                                                                                                   | <ul style="list-style-type: none"> <li>▪ Any signs described for scores 1, 2, or 3</li> </ul>                                                                               |

| BRD Case Definition |                                                                                                                                                                                               |
|---------------------|-----------------------------------------------------------------------------------------------------------------------------------------------------------------------------------------------|
| BRD Score           | Criteria                                                                                                                                                                                      |
| 1 – 2               | <ul style="list-style-type: none"> <li>▪ AND a rectal temperature <math>\geq 40</math> °C</li> </ul>                                                                                          |
| $\geq 3$            | <ul style="list-style-type: none"> <li>▪ Regardless of rectal temperature</li> <li>▪ With <u>NO</u> other obvious signs of disease (e.g., lameness, diarrhea, swollen limbs, etc.)</li> </ul> |

**Table S1.** Overview of statistical analyses for calves sampled near 36DOF for all culture and susceptibility (C/S) test results considered associated with C/S results for samples collected at 1DOF and 13DOF for individual calf-level, pen-level, and contextual analysis.

|                                             | <b>Individual outcomes &amp; risk factors</b> | <b>Pen-level outcomes &amp; risk factors</b> |
|---------------------------------------------|-----------------------------------------------|----------------------------------------------|
| <b>Risk period for outcome of interest:</b> | <b>Outcome DNP C/S - Calf status 36DOF</b>    | <b>Outcome DNP C/S - Pen results 36DOF</b>   |
| <b>36DOF</b>                                | Individual calf results from C/S at 1DOF      | Pen results from calf C/S at 1DOF            |
| <b>36DOF</b>                                | Individual calf results from C/S at 13DOF     | Pen results from calf C/S at 13DOF           |

**Culture and susceptibility (C/S) results considered:**

- recovery of *M. haemolytica*, *P. multocida*, or *H. somni*
- co-isolation of two or more bacteria
- recovery of any BRD bacteria with: any AMR, macrolide resistance, or tetracycline resistance

**Table S2.** For calves sampled near 36DOF, associations between culture and susceptibility (C/S) results for calves at 1DOF and likelihood of subsequent C/S results near 36DOF.  $n=309$  calves (tag identification not available for one calf at 1DOF). Analysis adjusted for year and injectable metaphylaxis administered and accounted for clustering by pen cohort.

| Risk Factor: Culture Positive at 1DOF              | Outcome: C/S result near 36DOF                   | OR         | 95% CI        |          | P-value      |
|----------------------------------------------------|--------------------------------------------------|------------|---------------|----------|--------------|
|                                                    |                                                  |            | Lower         | Upper    |              |
| <i>M. haemolytica</i>                              | <i>M. haemolytica</i>                            | 1.0        | 0.6           | 1.8      | 0.96         |
| <b><i>P. multocida</i></b>                         | <b><i>P. multocida</i></b>                       | <b>2.0</b> | 1.1           | 3.7      | <b>0.02</b>  |
| <i>H. somni</i>                                    | <i>H. somni</i>                                  | 0.6        | 0.2           | 1.4      | 0.23         |
| Any bacteria with AMR                              | Any bacteria with AMR                            | 1.2        | 0.3           | 4.3      | 0.83         |
| Any bacteria with macrolide resistance*            | Any bacteria with macrolide resistance           |            | Not estimable |          |              |
| <b>Any bacteria with tetracycline resistance**</b> | <b>Any bacteria with tetracycline resistance</b> | <b>16</b>  | 2.4           | $\infty$ | <b>0.008</b> |

\*Zero calves sampled near 36DOF had bacteria with macrolide resistance recovered at 1DOF.

\*\*Exact logistic regression equation (SAS® version 9.4, Cary, NC, USA).

**Table S3.** For calves sampled near 36DOF, associations between culture and susceptibility (C/S) for calves at 13DOF and likelihood of subsequent C/S at 36DOF. Analysis adjusted for year and injectable metaphylaxis administered and accounted for clustering by pen cohort. AST data were not available for one calf at time point 3 (pen 16);  $n=309$  calves for AMR analyses (N=16 pens).

| Risk Factor: Culture Positive at 13DOF    | Outcome: C/S result near 36DOF            | OR         | 95% CI     |           | P-value          |
|-------------------------------------------|-------------------------------------------|------------|------------|-----------|------------------|
|                                           |                                           |            | Lower      | Upper     |                  |
| <i>M. haemolytica</i>                     | <i>M. haemolytica</i>                     | 1.2        | 0.7        | 1.9       | 0.48             |
| <b><i>P. multocida</i></b>                | <b><i>P. multocida</i></b>                | <b>6.8</b> | <b>3.1</b> | <b>15</b> | <b>&lt;0.001</b> |
| <i>H. somni</i>                           | <i>H. somni</i>                           | 1.0        | 0.3        | 3.4       | 0.97             |
| Any bacteria with AMR                     | Any bacteria with AMR                     | 1.9        | 0.8        | 4.2       | 0.13             |
| Any bacteria with macrolide resistance*   | Any bacteria with macrolide resistance    | 1.2        | 0.5        | 2.7       | 0.62             |
| Any bacteria with tetracycline resistance | Any bacteria with tetracycline resistance | 3.1        | 0.9        | 11        | 0.08             |

\*Unconditional GEE reported as zero calves sampled near 36DOF from year 2021/oxytetracycline cohorts had bacteria with macrolide resistance recovered.

**Table S4.** For calves sampled near 36DOF, associations between culture and susceptibility (C/S) results at 36DOF given pen-level prevalence of C/S results at 1DOF and 13DOF. Analysis adjusted for year and metaphylaxis and accounted for clustering by pen cohort.  $n=1,599$  calves at 1DOF and 1,596 calves at 13DOF (N=16 pens) (SAS® version 9.4, Cary, NC, USA).

| Risk Factor: Pen-level C/S Prevalence  | Outcome Pen Probability        | OR         | 95% CI     |            | P-value           |
|----------------------------------------|--------------------------------|------------|------------|------------|-------------------|
|                                        |                                |            | Lower      | Upper      |                   |
| <b>Increase in prevalence at 1DOF</b>  | <b>C/S at 36DOF</b>            |            |            |            |                   |
| <i>M. haemolytica</i> (5%)             | <i>M. haemolytica</i>          | 1.0        | 0.9        | 1.2        | 0.53              |
| <i>P. multocida</i> (5%)               | <i>P. multocida</i>            | 1.0        | 0.9        | 1.0        | 0.39              |
| <i>H. somni</i> (5%)                   | <i>H. somni</i>                | 1.0        | 0.9        | 1.1        | 0.91              |
| <b>Tetracycline resistance (5%)</b>    | <b>Tetracycline resistance</b> | <b>1.5</b> | <b>1.2</b> | <b>1.9</b> | <b>0.0007</b>     |
| Macrolide resistance (5%)*             | Macrolide resistance           | 8.8        | 0.8        | 103        | 0.08              |
| Any AMR (5%)                           | Any AMR                        | 1.0        | 0.6        | 1.8        | 0.92              |
| <b>Increase in prevalence at 13DOF</b> | <b>C/S at 36DOF</b>            |            |            |            |                   |
| <i>M. haemolytica</i> (5%)             | <i>M. haemolytica</i>          | 1.0        | 0.9        | 1.0        | 0.23              |
| <i>P. multocida</i> (5%)               | <i>P. multocida</i>            | <b>1.2</b> | <b>1.2</b> | <b>1.3</b> | <b>&lt;0.0001</b> |
| <i>H. somni</i> (5%)                   | <i>H. somni</i>                | 1.0        | 0.8        | 1.3        | 0.93              |
| <b>Tetracycline resistance (5%)</b>    | <b>Tetracycline resistance</b> | <b>1.0</b> | <b>1.0</b> | <b>1.1</b> | <b>0.04</b>       |
| <b>Macrolide resistance (5%)*</b>      | <b>Macrolide resistance</b>    | <b>1.2</b> | <b>1.1</b> | <b>1.3</b> | <b>&lt;0.0001</b> |
| <b>Any AMR (5%)</b>                    | <b>Any AMR</b>                 | <b>1.0</b> | <b>1.0</b> | <b>1.1</b> | <b>0.01</b>       |

\*Unconditional GEE reported as zero calves sampled near 36DOF from year 2021/oxytetracycline cohorts had bacteria with macrolide resistance recovered.

**Table S5.** Summary of associations between culture and susceptibility (C/S) results at 1DOF and 13DOF and subsequent C/S for calves at 36DOF.

| <b>Individual calf level models</b>          |                     |                                                                                 |
|----------------------------------------------|---------------------|---------------------------------------------------------------------------------|
| <b>Predictor</b>                             | <b>Outcome</b>      | <b>Significant risk factors</b>                                                 |
| C/S result at 1DOF                           | C/S result at 36DOF | <i>P. multocida</i> , tetracycline resistance                                   |
| C/S result at 13DOF                          | C/S result at 36DOF | <i>P. multocida</i>                                                             |
| <b>Pen-level data</b>                        |                     |                                                                                 |
| <b>Risk factor: Pen-level C/S prevalence</b> | <b>Outcome</b>      | <b>Significant risk factors</b>                                                 |
| Pen prevalence at 1DOF                       | C/S result at 36DOF | Tetracycline                                                                    |
| Pen prevalence at 13DOF                      | C/S result at 36DOF | <i>P. multocida</i> , any AMR, macrolide resistance, or tetracycline resistance |
