# Supplementary material for: Association between respiratory disease pathogens in calves near feedlot arrival with treatment for bovine respiratory disease and subsequent antimicrobial resistance status
Source: Front Vet Sci. 2024 Jul 23;11:1416436. doi: 10.3389/fvets.2024.1416436 (PMC11300316; doi:10.3389/fvets.2024.1416436)
Supplement: Supplementary file 1 [file Table_1.xlsx]

## Sheet: Title page
	Supplementary Material
	Supplementary Tables S6 - S11
	Additional Information for Tables 4, 7-11
	Association between respiratory disease pathogens in calves near feedlot arrival with treatment for bovine respiratory disease and subsequent antimicrobial resistance status
	Jennifer N. Abi Younes1, John R. Campbell1, Sheryl P. Gow2, Amelia R. Woolums3, Cheryl L. Waldner1*
	1Department of Large Animal Clinical Sciences, Western College of Veterinary Medicine, University of Saskatchewan, Saskatoon, SK, Canada
	2Canadian Integrated Program for Antimicrobial Resistance Surveillance, Public Health Agency of Canada, Saskatoon, SK, Canada
	3Department of Pathobiology and Population Medicine, College of Veterinary Medicine, Mississippi State University, Mississippi State, MS, United States
	* Correspondence:
	Cheryl L. Waldner
	cheryl.walder@usask.ca

## Sheet: S6. Supplemental Table for 4
	Supplementary Table S6 for Table 4. Associations between study year, metaphylaxis antimicrobial administered and bacterial recovery from calves at the time of risk of first BRD treatment accounting for clustering by pen. n= 130 calves treated for BRD (n=1599 calves at risk, N=16 pens).
				OR	95% CI		P-value
	Bacteria	Year	Metaphylaxis		Lower	Upper
	M. haemolytica	2020	tulathromycin	reference category
		2021	tulathromycin	0.8	0.1	4.2	0.77
		2021	oxytetracycline	0.5	0.1	2.3	0.4
			DOF	1.00202	0.969379	1.03575	0.905
	P. multocida	2020	tulathromycin	reference category
		2021	tulathromycin	1.06	0.1	10.5	0.98
		2021	oxytetracycline	1.8	0.5	7.1	0.39
			DOF	1.0419	0.985932	1.10105	0.145
	H. somni	2020	tulathromycin	reference category
		2021	tulathromycin	0.6	0.2	2.3	0.49
		2021	oxytetracycline	0.8	0.3	2	0.67
			DOF	1.04664	0.98139	1.11623	0.165

## Sheet: S7. Supplemental Table for 7
	Supplementary Table S7 for Table 7. Associations between isolation of various bacteria from individual calves at 1DOF (n=1,599 calves) or 13DOF (n= 1,596 calves) and treatment for BRD. Analysis accounted for year and injectable metaphylaxis administered and adjusts for clustering by pen (N=16 pens).
			95% CI
	Risk Factor: Calf Culture Positive	OR	Lower	Upper	P-value	AUC		- Where both the variable of interest and metaphyaxis was significant - a separte model was run to test the signficance of the interaction term
	Calf Culture Positive at 1DOF (n=1,599)	Outcome: BRD<13DOF
	M. haemolytica	0.9245	0.676196	1.26398	0.623	−
	2021/tulathromycin vs. 2020/tulathromycin	0.54364	0.341	1.90704	0.341
	2021/oxytetracycline vs. 2020/tulathromycin	10.6008	3.91871	28.6769	< 0.001
	P. multocida	1.07004	0.687087	1.66645	0.765	−
	2021/tulathromycin vs. 2020/tulathromycin	0.541628	0.325	1.83845	0.325
	2021/oxytetracycline vs. 2020/tulathromycin	10.5233	3.8586	28.6993	< 0.001
	H. somni	0.969995	0.441906	2.12916	0.939	−
	2021/tulathromycin vs. 2020/tulathromycin	0.542679	0.335	1.87931	0.335
	2021/oxytetracycline vs. 2020/tulathromycin	10.4548	3.86424	28.2855	< 0.001
	Any bacteria with AMR	1.81113	0.913906	3.58922	0.089	−
	2021/tulathromycin vs. 2020/tulathromycin	0.627908	0.438	2.0364	0.438
	2021/oxytetracycline vs. 2020/tulathromycin	11.1595	3.93406	31.6553	< 0.001
	*Any bacteria with macrolide resistance	1.4	0	6.8	0.61	−
	Any bacteria with tetracycline resistance	1.76004	1.0898	2.8425	0.021	0.7679		Model with interaction term would not converge
	2021/tulathromycin vs. 2020/tulathromycin	0.556548	0.355	1.92798	0.355
	2021/oxytetracycline vs. 2020/tulathromycin	10.7612	3.94006	29.3911	< 0.001
	Calf Culture Positive at 1DOF (n=1,599)	Outcome: BRD ≤ 45DOF
	M. haemolytica	1.09021	0.867753	1.36969	0.458	−
	2021/tulathromycin vs. 2020/tulathromycin	0.922016	0.82	1.85555	0.82
	2021/oxytetracycline vs. 2020/tulathromycin	7.79898	3.82194	15.9145	< 0.001
	P. multocida	0.916763	0.632515	1.32875	0.646	−
	2021/tulathromycin vs. 2020/tulathromycin	0.923438	0.822	1.84792	0.822
	2021/oxytetracycline vs. 2020/tulathromycin	7.82515	3.88528	15.7602	< 0.001
	H. somni	0.670853	0.331413	1.35795	0.267	−
	2021/tulathromycin vs. 2020/tulathromycin	0.951522	0.89	1.92337	0.89
	2021/oxytetracycline vs. 2020/tulathromycin	7.86096	3.88569	15.9032	< 0.001
	Any AMR	0.932285	0.442169	1.96566	0.854	−
	2021/tulathromycin vs. 2020/tulathromycin	0.922265	0.822	1.86542	0.822
	2021/oxytetracycline vs. 2020/tulathromycin	7.86559	3.84135	16.1057	< 0.001
	*Any bacteria with macrolide resistance	1.7	0	8.1	0.65	−
	Any bacteria with tetracycline resistance	0.836698	0.464489	1.50717	0.553	−
	2021/tulathromycin vs. 2020/tulathromycin	0.920307	0.817	1.85805	0.817
	2021/oxytetracycline vs. 2020/tulathromycin	7.85351	3.85397	16.0037	< 0.001
	Calf Culture Positive at 13DOF (n=1,596)	BRD >13DOF (n=1,596)						Interaction term between M. haemolytica at 13DOF and metaphylaxis
	M. haemolytica	2.05765	1.26717	3.34124	0.004	0.8479		P-value	0.71
	2021/tulathromycin vs. 2020/tulathromycin	1.40789	0.650375	3.04769	0.385
	2021/oxytetracycline vs. 2020/tulathromycin	4.82001	2.64027	8.79927	< 0.001
								Interaction term between P.multocida at 13DOF and metaphylaxis
	P. multocida	2.22617	1.14757	4.31854	0.018	0.9154		P-value	0.25
	2021/tulathromycin vs. 2020/tulathromycin	1.15958	0.550022	2.44467	0.697
	2021/oxytetracycline vs. 2020/tulathromycin	3.77105	1.7848	7.96775	0.001
								Interaction term between H. somni at 13DOF and metaphylaxis
	H. somni	1.58475	1.05219	2.38688	0.028	0.8532		P-value	0.54
	2021/tulathromycin vs. 2020/tulathromycin	1.14549	0.522864	2.50956	0.734
	2021/oxytetracycline vs. 2020/tulathromycin	4.65198	2.37799	9.1005	< 0.001
	Any AMR	1.27588	0.788119	2.0655	0.322	−
	2021/tulathromycin vs. 2020/tulathromycin	1.28933	0.615457	2.70104	0.501
	2021/oxytetracycline vs. 2020/tulathromycin	5.22077	2.91233	9.35895	< 0.001
	Macrolide resistance	1.16579	0.494212	2.74998	0.726	−
	2021/tulathromycin vs. 2020/tulathromycin	1.24913	0.612059	2.54929	0.541
	2021/oxytetracycline vs. 2020/tulathromycin	5.21339	2.94165	9.23951	< 0.001
	Tetracycline resistance	1.15606	0.603681	2.21386	0.662	−
	2021/tulathromycin vs. 2020/tulathromycin	1.17442	0.536106	2.57273	0.688
	2021/oxytetracycline vs. 2020/tulathromycin	4.73285	2.40431	9.31655	< 0.001
	* Unconditional GEE performed

## Sheet: S8. Supplemental Table for 8
	Supplementary Table S8 for Table 8. For calves treated for BRD within 13DOF (n=65) and all calves treated for BRD within 45DOF (n=130), associations between culture and susceptibility (C/S) test results for calves at 1DOF and likelihood of corresponding C/S results at time of first BRD treatment. Analysis accounted for year, injectable metaphylaxis administered, and DOF at time of BRD treatment, …
				95% CI
	Risk Factor: Calf C/S at 1DOF	Outcome: Calf C/S at BRD Treatment ≤ 13DOF	OR	Lower	Upper	P-value	AUC		- Where both the variable of interest and metaphyaxis was significant - a separte model was run to test the signficance of the interaction term
	*M. haemolytica	M. haemolytica	1.10412	0.550096	2.21613	0.781	−
	P. multocida	P. multocida	1.92178	0.624591	5.91306	0.255	−
		2021/tulathromycin vs. 2020/tulathromycin	3.44337	0.179545	66.0382	0.412
		2021/oxytetracycline vs. 2020/tulathromycin	2.0176	0.194471	20.9322	0.556
		DOF	1.06224	0.713758	1.58087	0.766
	*H. somni	H. somni	9.80725	0.889077	108.182	0.062	−
	*Any AMR	Any bacteria with AMR	3.03667	0.595628	15.4817	0.181	−
	Any bacteria with Macrolide resistance	Any bacteria with macrolide resistance	not estimable**
	***Any bacteria with Tetracyline resistance	Any bacteria with tetracyline resistance	11.614	1.684	∞	0.0175	0.99		Interaction non-estimable
		2021/tulathromycin vs. 2020/tulathromycin	not estimable
		2021/oxytetracycline vs. 2020/tulathromycin	1.1	0.16	∞	0.47
	Risk Factor: Calf C/S at 1DOF	Outcome: Calf C/S at BRD Treatment ≤ 45DOF	OR	Lower 95% CI	Upper 95% CI	P-value	AUC
	M. haemolytica	M. haemolytica	1.11945	0.583115	2.14909	0.735
		2021/tulathromycin vs. 2020/tulathromycin	0.716966	0.135549	3.79229	0.695
		2021/oxytetracycline vs. 2020/tulathromycin	0.519614	0.120273	2.24487	0.381
		DOF	1.00418	0.971897	1.03753	0.802
	P. multocida	P. multocida	1.4507	0.74708	2.81701	0.272	−
		2021/tulathromycin vs. 2020/tulathromycin	1.25266	0.099367	15.7916	0.862
		2021/oxytetracycline vs. 2020/tulathromycin	3.4395	0.566965	20.8657	0.179
		DOF	1.04207	0.98603	1.10129	0.144
	H. somni		2.00096	0.268761	14.8973	0.498	−
	2021/tulathromycin vs. 2020/tulathromycin		0.739204	0.214987	2.54165	0.632
	2021/oxytetracycline vs. 2020/tulathromycin		1.37972	0.441508	4.31164	0.58
	DOF		1.03896	0.975928	1.10606	0.231
	Any AMR	Any AMR	2.1117	0.593696	7.51106	0.248	−
		2021/tulathromycin vs. 2020/tulathromycin	0.25985	0.0247898	2.72377	0.261
		2021/oxytetracycline vs. 2020/tulathromycin	0.635632	0.142314	2.83899	0.553
		DOF	1.02389	0.9725	1.07799	0.369
	Any bacteria with Macrolide resistance	Macrolide Resistance	not estimable**
	***Any bacteria with Tetracyline resistance	Tetracyline resistance	0.084	0	0.567	0.0156	0		Interaction non-estimable
		2021/tulathromycin vs. 2020/tulathromycin	0.940353	0.352396	∞	0.55
		2021/oxytetracycline vs. 2020/tulathromycin	0.384774	0	0.74759	0.007
	*Unconditional GEE performed.
	**There were zero calves treated for BRD with macrolide resistance at 1DOF.
	***Exact logistic regression (SAS® version 9.4, Cary, NC, USA) adjusted for year and metaphylaxis. There were only 3 calves with tetracycline resistance at 1DOF sample.

## Sheet: S9. Supplemental Table for 9
	Supplementary Table S9 for Table 9. For calves treated for BRD after 13DOF (n=65), associations between culture and susceptibility (C/S) test results at 13DOF and likelihood of corresponding C/S results for calf at time of BRD treatment. Analysis accounted for year and injectable metaphylaxis administered, and DOF at time of BRD treatment, and adjust for clustering by pen-cohort unless otherwise …
	Risk Factor: Calf C/S at 13DOF	Outcome: Calf C/S at BRD Treatment ≤ 45DOF	OR	Lower	Upper	P-value	AUC		- Where both the variable of interest and metaphyaxis was significant - a separte model was run to test the signficance of the interaction term
	M. haemolytica	M. haemolytica	2.78726	0.695405	11.1717	0.148	−
		2021/tulathromycin vs. 2020/tulathromycin	1.16247	0.907	14.5072	0.907
		2021/oxytetracycline vs. 2020/tulathromycin	0.211666	0.0297957	1.50365	0.121
		DOF	0.971783	0.907851	1.04022	0.41
									Interaction term between P.multocida at 13DOF and metaphylaxis
	P. multocida	P. multocida	4.43721	1.28387	15.3356	0.019	0.9766		P-value	0.71
		2021/tulathromycin vs. 2020/tulathromycin	0.424211	0.395	3.06185	0.395
		2021/oxytetracycline vs. 2020/tulathromycin	1.41267	0.153296	13.0183	0.76
		DOF	0.951752	0.867402	1.04431	0.296
	H. somni	H. somni	2.51108	0.756448	8.33568	0.133	−
		2021/tulathromycin vs. 2020/tulathromycin	0.482764	0.376	2.42156	0.376
		2021/oxytetracycline vs. 2020/tulathromycin	0.588401	0.122888	2.81732	0.507
		DOF	0.979555	0.87638	1.09488	0.716
									Interaction term between Any AMR at 13DOF and metaphylaxis
	Any bacteria with AMR	Any bacteria with AMR	4.8574	1.10822	21.2903	0.036	0.99		P-value	0.63
		2021/tulathromycin vs. 2020/tulathromycin	0.491831	0.565	5.51685	0.565
		2021/oxytetracycline vs. 2020/tulathromycin	0.370591	0.0453569	3.02793	0.354
		DOF	0.978223	0.92459	1.03497	0.444
	*Any bacteria with macrolide resistance	*Any bacteria with macrolide resistance	9.7533	1.24329	76.5122	0.03	0.99		Interaction could not be assessed
	*Any bacteria with tetracyline resistance	*Any bacteria with tetracyline resistance	2.87069	1.79474	4.59169	< 0.001	0.99		Interaction could not be assessed
	*Unconditional GEE performed.

## Sheet: S10. Supplemental Table for 10
	Supplementary Table S10 for Table 10. Associations between pen-level prevalence of culture and susceptibility (C/S) results and pen-level risk of BRD. Analysis adjusted for year and metaphylaxis as well as accounting for clustering at the pen level. n=1,599 calves at 1DOF and 1,596 calves at 13DOF (N=16 pens).
	Risk Factor:			95% CI
	Increase in Pen-Level C/S Results	Year/Metaphylaxis fixed variable	OR	Lower	Upper	P-value	AUC		- Where both the variable of interest and metaphyaxis was significant - a separte model was run to test the signficance of the interaction term
	Prevalence at 1DOF	BRD < 13DOF
	M. haemolytica (5%)	M. haemolytica	1.05	0.98	1.1	0.16	−
		2021/tulathromycin vs. 2020/tulathromycin	0.780031	0.146092	4.16667	0.7716
		2021/oxytetracycline vs. 2020/tulathromycin	14.7059	2.59067	83.3333	0.0024
	P. multocida (5%)	P. multocida	1.03	0.97	1.1	0.28	−
		2021/tulathromycin vs. 2020/tulathromycin	0.43573	0.130378	1.45773	0.1773
		2021/oxytetracycline vs. 2020/tulathromycin	7.75194	2.71003	22.2222	0.0001
	H. somni (5%)	H. somni	0.96	0.8	1.2	0.68	−
		2021/tulathromycin vs. 2020/tulathromycin	0.614251	0.169033	2.23214	0.4592
		2021/oxytetracycline vs. 2020/tulathromycin	7.5188	2.6178	21.7391	0.0002
	Any AMR (5%)	Any AMR	1.02	0.98	1.1	0.46	−
		2021/tulathromycin vs. 2020/tulathromycin	0.514403	0.14758	1.79211	0.2966
		2021/oxytetracycline vs. 2020/tulathromycin	10	4.03226	25	<0.0001
	Macrolide resistance (5%)	Macrolide resistance	1.03	0.97	1.1	0.27	−
		2021/tulathromycin vs. 2020/tulathromycin	0.457875	0.155836	1.34409	0.1553
		2021/oxytetracycline vs. 2020/tulathromycin	7.93651	3.10559	20	<0.0001
	Tetracycline Resistance (5%)	Tetracycline Resistance	0.99	0.97	1	0.08	−
		2021/tulathromycin vs. 2020/tulathromycin	0.597729	0.169693	2.10526	0.4235
		2021/oxytetracycline vs. 2020/tulathromycin	10.7527	4.36681	26.3158	<0.0001
	Prevalence at 1DOF	BRD < 45DOF
	M. haemolytica (5%)	M. haemolytica	1	0.8	1.3	0.76	−
		2021/tulathromycin vs. 2020/tulathromycin	0.819672	0.296912	2.26244	0.7005
		2021/oxytetracycline vs. 2020/tulathromycin	7.04225	2.1978	22.7273	0.001
	P. multocida (5%)	P. multocida	0.94	0.9	1	0.11	−
		2021/tulathromycin vs. 2020/tulathromycin	0.796813	0.405844	1.56495	0.5089
		2021/oxytetracycline vs. 2020/tulathromycin	6.45161	3.25733	12.8205	<0.0001
									Interaction term between H. somni at 1DOF and metaphylaxis
	H. somni (5%)	H. somni	0.7	0.5	0.9	0.017	0.7629		P-value	0.57
		2021/tulathromycin vs. 2020/tulathromycin	0.999001	0.494315	2.0202	0.9973
		2021/oxytetracycline vs. 2020/tulathromycin	5.98802	3.003	11.9048	<0.0001
	Any AMR (5%)	Any AMR	0.7	0.4	1.3	0.31	−
		2021/tulathromycin vs. 2020/tulathromycin	0.840336	0.436872	1.61551	0.6016
		2021/oxytetracycline vs. 2020/tulathromycin	7.29927	3.7594	14.0845	<0.0001
	Macrolide resistance (5%)	Macrolide resistance	0.4	0.04	4.7	0.48	−
		2021/tulathromycin vs. 2020/tulathromycin	0.825764	0.464037	1.46843	0.5142
		2021/oxytetracycline vs. 2020/tulathromycin	6.53595	3.23625	13.1579	<0.0001
	Tetracycline Resistance (5%)	Tetracycline Resistance	0.9	0.51	1.5	0.67	−
		2021/tulathromycin vs. 2020/tulathromycin	0.87184	0.434028	1.75131	0.7008
		2021/oxytetracycline vs. 2020/tulathromycin	7.75194	3.92157	15.3846	<0.0001
	Prevalence at 13DOF	BRD > 13DOF
	M. haemolytica (5%)	M. haemolytica	0.9	0.6	1.2	0.51	−
		2021/tulathromycin vs. 2020/tulathromycin	1.51976	0.726216	3.1746	0.267
		2021/oxytetracycline vs. 2020/tulathromycin	4.87805	2.7933	8.54701	<0.0001
	P. multocida (5%)	P. multocida	0.9	0.8	1.1	0.24	−
		2021/tulathromycin vs. 2020/tulathromycin	1.16959	0.55371	2.46914	0.682
		2021/oxytetracycline vs. 2020/tulathromycin	4.01606	1.87266	8.62069	0.0004
	H. somni (5%)	H. somni	0.6	0.4	1.1	0.1	−
		2021/tulathromycin vs. 2020/tulathromycin	1.23762	0.564016	2.71003	0.5952
		2021/oxytetracycline vs. 2020/tulathromycin	5.15464	2.55754	10.3093	<0.0001
	Any AMR (5%)	Any AMR	0.9	0.4	1.9	0.72	−
		2021/tulathromycin vs. 2020/tulathromycin	1.31579	0.652316	2.65252	0.4438
		2021/oxytetracycline vs. 2020/tulathromycin	5.29101	3.0581	9.17431	<0.0001
	Macrolide resistance (5%)	Macrolide resistance	0.3	0.03	2.4	0.23	−
		2021/tulathromycin vs. 2020/tulathromycin	1.53139	0.710732	3.30033	0.2768
		2021/oxytetracycline vs. 2020/tulathromycin	6.75676	3.32226	13.6986	<0.0001
	Tetracycline Resistance (5%)	Tetracycline Resistance	1.2	0.6	2.3	0.56	−
		2021/tulathromycin vs. 2020/tulathromycin	1.19332	0.556483	2.55754	0.6498
		2021/oxytetracycline vs. 2020/tulathromycin	5.05051	2.75482	9.25926	<0.0001

## Sheet: S11. Supplemental Table for  11
	Suplementary Table S11 for Table 11. Associations between pen-level prevalence of C/S results at 1DOF and 13DOF and pen culture and susceptibility (C/S) prevalence at time of BRD treatment. Analysis adjusted for year and metaphylaxis as well as accounting for clustering at the pen-level. n=1,599 calves at 1DOF and 1,596 calves at 13DOF (N=16 pens).
	Risk Factor:	Outcome: Pen Prevalence		95% CI
	Increase in Pen-Level C/S Results	C/S at BRD Treatment	OR	Lower	Upper	P-value	AUC		- Where both the variable of interest and metaphyaxis was significant - a separte model was run to test the signficance of the interaction term
	Prevalence at 1DOF	BRD < 13DOF
	M. haemolytica (5%)	M. haemolytica	1.21484	0.768646	1.92005	0.4047	−
		2021/tulathromycin vs. 2020/tulathromycin	0.14476	0.0149065	1.40647	0.0956
		2021/oxytetracycline vs. 2020/tulathromycin	0.771605	0.209074	2.849	0.6976
									Interaction term between P.multocida at 1DOF and metaphylaxis
	P. multocida (5%)	P. multocida	0.48377	0.239086	0.978862	0.0434	0.738		P-value	0.8
		2021/tulathromycin vs. 2020/tulathromycin	0.105876	0.00322569	3.47222	0.2074
		2021/oxytetracycline vs. 2020/tulathromycin	0.0384379	0.00188542	0.783699	0.0341
	H. somni (5%)	H. somni	1.37299	0.686777	2.74483	0.3698	−
		NA
	Any AMR (5%)	Any AMR	5.59579	2.05163	15.2625	0.0008	0.6123		Interaction could not be assessed
		NA
	Macrolide resistance (5%)	Macrolide resistance	975	33	29439	<0.0001	0.8065		Interaction could not be assessed
		NA
	Tetracycline Resistance (5%)	Tetracycline Resistance	3.38186	1.5128	7.56014	0.003	0.6429		Interaction could not be assessed
		NA
	Prevalence at 1DOF	BRD < 45DOF
	M. haemolytica (5%)	M. haemolytica	1.26229	0.889016	1.79227	0.1928	−
		2021/tulathromycin vs. 2020/tulathromycin	0.464468	0.0838856	2.57069	0.3799
		2021/oxytetracycline vs. 2020/tulathromycin	0.367512	0.111595	1.21065	0.0997
	P. multocida (5%)	P. multocida	0.686256	0.458395	1.02738	0.0674	−
		2021/tulathromycin vs. 2020/tulathromycin	0.329056	0.0374251	2.89017	0.3162
		2021/oxytetracycline vs. 2020/tulathromycin	0.365631	0.0368067	3.63636	0.3904
	H. somni (5%)	H. somni	1.13947	0.6307	2.05865	0.6653	−
		2021/tulathromycin vs. 2020/tulathromycin	0.583771	0.147754	2.30415	0.4423
		2021/oxytetracycline vs. 2020/tulathromycin	0.892061	0.396197	2.00803	0.7826
	Any AMR (5%)	Any AMR	1.8074	0.337104	9.69049	0.4897	−
		2021/tulathromycin vs. 2020/tulathromycin	0.259471	0.0244505	2.75482	0.263
		2021/oxytetracycline vs. 2020/tulathromycin	0.552486	0.137476	2.21729	0.4029
	Macrolide resistance (5%)	Macrolide resistance	22	1.8	263	0.016	0.6287		Interaction could not be assessed
		NA
	Tetracycline Resistance (5%)	Tetracycline Resistance	10.9988	5.3749	22.507	<0.0001	0.771		Interaction could not be assessed
		NA
	Prevalence at 13DOF	BRD > 13DOF
	M. haemolytica (5%)	M. haemolytica	1.42854	1.2141	1.68085	<0.0001	0.7574		Interaction term between M. haemolytica at 13DOF and metaphylaxis
		2021/tulathromycin vs. 2020/tulathromycin	3.10559	0.504286	19.2308	0.2215			P-value	0.17
		2021/oxytetracycline vs. 2020/tulathromycin	0.114626	0.0275323	0.477327	0.0029
	P. multocida (5%)	P. multocida	1.18306	0.884728	1.58199	0.2569	−
		2021/tulathromycin vs. 2020/tulathromycin	0.820345	0.0915835	7.35294	0.8597
		2021/oxytetracycline vs. 2020/tulathromycin	1.3947	0.289184	6.71141	0.679
	H. somni (5%)	H. somni	1.08207	0.737931	1.58672	0.6863	−
		2021/tulathromycin vs. 2020/tulathromycin	0.715308	0.254907	2.00803	0.525
		2021/oxytetracycline vs. 2020/tulathromycin	1.37931	0.4649	4.09836	0.5618
	Any AMR (5%)	Any AMR	1.73556	1.4208	2.12006	<0.0001	0.8869		Interaction term between Any AMR at 13DOF and metaphylaxis
		2021/tulathromycin vs. 2020/tulathromycin	37.037	3.7594	333.333	0.002			P-value	0.11
		2021/oxytetracycline vs. 2020/tulathromycin	27.7778	5.18135	142.857	0.0001
	Macrolide resistance (5%)	Macrolide resistance	1.32988	1.16716	1.51526	<0.0001	0.9353		Interaction could not be assessed
		NA
	Tetracycline Resistance (5%)	Tetracycline Resistance	1.8	1.4	2.4	<0.0001	0.85		Interaction could not be assessed
		NA
